# Supplementary material
Source: ML conference proceedings conference paper supplement (https://proceedings.mlr.press/v89/letarte19a.html)
Supplement: Supplementary file [file letarte19a-supp.pdf]

## A Supplementary Material

### A.1 Mathematical Results

**Corollary 2.** For  $t > 0$  and a prior distribution  $p$  over  $\mathbb{R}^d$ , with probability  $1-\varepsilon$  over the choice of  $S \sim \mathcal{D}^n$ , we have for all  $q$  on  $\mathbb{R}^d$ :

$$\mathcal{L}_{\mathcal{D}}(k_q) \leq \widehat{\mathcal{L}}_S(k_q) + \frac{2}{t} \left( \text{KL}(q\|p) + \frac{t^2}{2(n-1)} + \ln \frac{n+1}{\varepsilon} \right).$$

*Proof.* We want to bound

$$\begin{aligned} \mathcal{L}_{\mathcal{D}}(k_q) &= \mathbf{E}_{(\mathbf{x}, y) \sim \mathcal{D}} \mathbf{E}_{(\mathbf{x}', y') \sim \mathcal{D}} \mathbf{E}_{\omega \sim q} \ell \left( h_{\omega}(\mathbf{x} - \mathbf{x}'), \lambda(y, y') \right) \\ &= \mathbf{E}_{(\mathbf{x}', y') \sim \mathcal{D}} \mathcal{L}'_{\mathcal{D}}(k_q), \end{aligned}$$

where  $\mathcal{L}'_{\mathcal{D}}(k_q)$  is the alignment loss of the kernel  $k_q$  centered on  $(\mathbf{x}', y') \sim \mathcal{D}$  (see Equation (10)).

Let  $t > 0$  and  $p$  a distribution on  $\mathbb{R}^d$ . By applying the PAC-Bayesian theorem, with  $\varepsilon_0 \in (0, 1)$ , we have

$$\Pr_{S \sim \mathcal{D}^n} \left( \forall q \text{ on } \mathbb{R}^d : \mathcal{L}_{\mathcal{D}}(k_q) \leq \frac{1}{n} \sum_{i=1}^n \mathcal{L}_{\mathcal{D}}^i(k_q) + \frac{1}{t} \left[ \text{KL}(q\|p) + \frac{t^2}{2n} + \ln \frac{1}{\varepsilon_0} \right] \right) \geq 1 - \varepsilon_0.$$

Moreover, we have that for each  $i \in \{1, \dots, n\}$ , with a  $\varepsilon_i \in (0, 1)$ , we have

$$\Pr_{S \sim \mathcal{D}^n} \left( \forall q \text{ on } \mathbb{R}^d : \mathcal{L}_{\mathcal{D}}^i(k_q) \leq \widehat{\mathcal{L}}_S^i(k_q) + \frac{1}{t} \left[ \text{KL}(q\|p) + \frac{t^2}{2(n-1)} + \ln \frac{1}{\varepsilon_i} \right] \right) \geq 1 - \varepsilon_i.$$

By combining above probabilistic results with  $\varepsilon_0 = \varepsilon_1 = \dots = \varepsilon_n = \frac{\varepsilon}{n+1}$ , we obtain that, with probability at least  $1 - \varepsilon$ ,

$$\begin{aligned} \mathcal{L}_{\mathcal{D}}(k_q) &= \mathbf{E}_{(\mathbf{x}', y') \sim \mathcal{D}} \mathcal{L}'_{\mathcal{D}}(k_q) \\ &\leq \frac{1}{n} \sum_{i=1}^n \left[ \widehat{\mathcal{L}}_S^i(k_q) + \frac{1}{t} \left[ \text{KL}(q\|p) + \frac{t^2}{2(n-1)} + \ln \frac{n+1}{\varepsilon} \right] \right] + \frac{1}{t} \left[ \text{KL}(q\|p) + \frac{t^2}{2n} + \ln \frac{n+1}{\varepsilon} \right] \\ &= \widehat{\mathcal{L}}_S(k_q) + \frac{1}{t} \left[ \text{KL}(q\|p) + \frac{t^2}{2(n-1)} + \ln \frac{n+1}{\varepsilon} \right] + \frac{1}{t} \left[ \text{KL}(q\|p) + \frac{t^2}{2n} + \ln \frac{n+1}{\varepsilon} \right] \\ &\leq \widehat{\mathcal{L}}_S(k_q) + \frac{2}{t} \left[ \text{KL}(q\|p) + \frac{t^2}{2(n-1)} + \ln \frac{n+1}{\varepsilon} \right]. \end{aligned}$$

□

**Lemma 6.** For any data-generating distribution  $\mathcal{D}$ :

$$\mathbf{Var}_{S' \sim \mathcal{D}^n} (\mathcal{L}_{S'}(h_{\omega})) \leq \frac{1}{4n}.$$

*Proof.* Given  $S' = \{(\mathbf{x}_i, y_i)\}_{i=1}^n \sim \mathcal{D}^n$ , we denote

$$\mathcal{F}_{\omega}(S') := \mathcal{F}_{\omega}((\mathbf{x}_1, y_1), \dots, (\mathbf{x}_n, y_n)) := \mathcal{L}_{S'}(h_{\omega}) = \frac{1}{n(n-1)} \sum_{i \neq j}^n \ell \left( h_{\omega}(\mathbf{x}_i - \mathbf{x}_j), \lambda(y_i, y_j) \right).$$

The function  $\mathcal{F}_{\omega}$  above has the *bounded differences property*. That is, for each  $i \in \{1, \dots, n\}$ :

$$\sup_{S', \mathbf{x}^* \in \mathbb{R}^d, y^* \in Y} \left| \mathcal{F}_{\omega}((\mathbf{x}_1, y_1), \dots, (\mathbf{x}_n, y_n)) - \mathcal{F}_{\omega}((\mathbf{x}_1, y_1), \dots, (\mathbf{x}_{i-1}, y_{i-1}), (\mathbf{x}^*, y^*), (\mathbf{x}_{i+1}, y_{i+1}), \dots, (\mathbf{x}_n, y_n)) \right| \leq \frac{1}{n},$$

Thus, we apply the Efron-Stein inequality (following [Boucheron et al., 2013](#), Corollary 3.2) to obtain

$$\mathbf{Var}_{S' \sim \mathcal{D}^n}(\mathcal{F}_\omega(S')) \leq \frac{1}{4} \sum_{i=1}^n \left(\frac{1}{n}\right)^2 = \frac{1}{4n}.$$

□

## A.2 Kernel Alignment Loss Computation

The kernel learning algorithms presented in Section 5 require to compute the empirical kernel alignment loss for each hypothesis  $h_\omega$ , given by

$$\widehat{\mathcal{L}}_S(h_\omega) = \frac{1}{n(n-1)} \sum_{i \neq j}^n \ell(h_\omega(\delta_{ij}), \lambda_{ij}). \quad (21)$$

A naive implementation of Equation (21) would need  $O(n^2)$  steps. Propositions 7 and 8 below show how to rewrite Equation (21) in a form that needs  $O(n)$  steps. Proposition 7 is dedicated to the binary classification, and is equivalent to the computation method proposed by [Sinha and Duchi \(2016\)](#). By Proposition 8, we extend the result to the multi-classification case.

**Proposition 7** (Binary classification). *When  $S = (\mathbf{x}_i, y_i)_{i=1}^n \in (\mathbb{R}^d \times \{-1, 1\})^n$ , we have*

$$\widehat{\mathcal{L}}_S(h_\omega) = \frac{n}{2(n-1)} - \frac{1}{2n(n-1)} \left[ \left( \sum_{i=1}^n y_i \cos(\omega \cdot \mathbf{x}_i) \right)^2 + \left( \sum_{i=1}^n y_i \sin(\omega \cdot \mathbf{x}_i) \right)^2 \right].$$

That is, in the binary classification case ( $y \in \{-1, 1\}$ ), one can compute the empirical alignment loss  $\widehat{\mathcal{L}}_S(h_\omega)$  in  $O(n)$  steps.

*Proof.* Using the cosine trigonometric identity

$$\begin{aligned} \sum_{i \neq j}^n \lambda_{ij} h_\omega(\mathbf{x}_i - \mathbf{x}_j) &= \sum_{i=1}^n \sum_{j=1}^n y_i y_j \cos(\omega \cdot (\mathbf{x}_i - \mathbf{x}_j)) - n \\ &= \sum_{i=1}^n \sum_{j=1}^n y_i y_j (\cos(\omega \cdot \mathbf{x}_i) \cos(\omega \cdot \mathbf{x}_j) + \sin(\omega \cdot \mathbf{x}_i) \sin(\omega \cdot \mathbf{x}_j)) - n \\ &= \left( \sum_{i=1}^n y_i \cos(\omega \cdot \mathbf{x}_i) \right)^2 + \left( \sum_{i=1}^n y_i \sin(\omega \cdot \mathbf{x}_i) \right)^2 - n \end{aligned}$$

Thus,

$$\begin{aligned} \widehat{\mathcal{L}}_S(h_\omega) &= \frac{1}{n(n-1)} \sum_{i \neq j}^n \ell(h_\omega(\delta_{ij}), \lambda_{ij}) \\ &= \frac{1}{n(n-1)} \sum_{i \neq j}^n \frac{1 - \lambda_{ij} h_\omega(\delta_{ij})}{2} \\ &= \frac{1}{2} - \frac{1}{2n(n-1)} \sum_{i \neq j}^n \lambda_{ij} h_\omega(\mathbf{x}_i - \mathbf{x}_j) \\ &= \frac{1}{2} - \frac{1}{2n(n-1)} \left[ \left( \sum_{i=1}^n y_i \cos(\omega \cdot \mathbf{x}_i) \right)^2 + \left( \sum_{i=1}^n y_i \sin(\omega \cdot \mathbf{x}_i) \right)^2 - n \right] \\ &= \frac{n}{2(n-1)} - \frac{1}{2n(n-1)} \left[ \left( \sum_{i=1}^n y_i \cos(\omega \cdot \mathbf{x}_i) \right)^2 + \left( \sum_{i=1}^n y_i \sin(\omega \cdot \mathbf{x}_i) \right)^2 \right]. \end{aligned}$$

□

**Proposition 8** (Multi-class classification). *When  $S = (\mathbf{x}_i, y_i)_{i=1}^n \in (\mathbb{R}^d \times \{1, \dots, L\})^n$ , we have*

$$\widehat{\mathcal{L}}_S(h_\omega) = \frac{n}{2(n-1)} - \frac{1}{2n(n-1)} \left[ 2 \sum_{y=1}^L (c_y^2 + s_y^2) - \left( \sum_{y=1}^L c_y \right)^2 - \left( \sum_{y=1}^L s_y \right)^2 \right],$$

with

$$c_y := \sum_{\mathbf{x} \in S_y} \cos(\omega \cdot \mathbf{x}) \quad \text{and} \quad s_y := \sum_{\mathbf{x} \in S_y} \sin(\omega \cdot \mathbf{x}).$$

That is, in the multi-class classification case with  $L$  classes ( $y \in \{1, \dots, L\}^n$ ), one can compute the empirical alignment loss  $\widehat{\mathcal{L}}_S(h_\omega)$  in  $O(n)$  steps.

*Proof.*

$$\begin{aligned} \sum_{i \neq j}^n \lambda_{ij} h_\omega(\mathbf{x}_i - \mathbf{x}_j) &= \sum_{i=1}^n \sum_{j=1}^n \lambda_{ij} \cos(\omega \cdot (\mathbf{x}_i - \mathbf{x}_j)) - n \\ &= \sum_{i=1}^n \sum_{j=1}^n (2I[y_i = y_j] - 1) \cos(\omega \cdot (\mathbf{x}_i - \mathbf{x}_j)) - n \\ &= 2 \sum_{i=1}^n \sum_{j=1}^n I[y_i = y_j] \cos(\omega \cdot (\mathbf{x}_i - \mathbf{x}_j)) - \sum_{i=1}^n \sum_{j=1}^n \cos(\omega \cdot (\mathbf{x}_i - \mathbf{x}_j)) - n \end{aligned}$$

Let's denote  $S_y := \{\mathbf{x}_i | (\mathbf{x}_i, y) \in S\}$ . We have

$$\begin{aligned} \sum_{i=1}^n \sum_{j=1}^n I[y_i = y_j] \cos(\omega \cdot (\mathbf{x}_i - \mathbf{x}_j)) &= \sum_{y=1}^L \sum_{\mathbf{x} \in S_y} \sum_{\mathbf{x}' \in S_y} \cos(\omega \cdot (\mathbf{x} - \mathbf{x}')) \\ &= \sum_{y=1}^L \left[ \left( \sum_{\mathbf{x} \in S_y} \cos(\omega \cdot \mathbf{x}) \right)^2 + \left( \sum_{\mathbf{x} \in S_y} \sin(\omega \cdot \mathbf{x}) \right)^2 \right], \end{aligned}$$

and

$$\sum_{i=1}^n \sum_{j=1}^n \cos(\omega \cdot (\mathbf{x}_i - \mathbf{x}_j)) = \left( \sum_{y=1}^L \sum_{\mathbf{x} \in S_y} \cos(\omega \cdot \mathbf{x}) \right)^2 + \left( \sum_{y=1}^L \sum_{\mathbf{x} \in S_y} \sin(\omega \cdot \mathbf{x}) \right)^2.$$

Thus, we can rewrite

$$\sum_{i \neq j}^n \lambda_{ij} h_\omega(\mathbf{x}_i - \mathbf{x}_j) = 2 \sum_{y=1}^L (c_y^2 + s_y^2) - \left( \sum_{y=1}^L c_y \right)^2 - \left( \sum_{y=1}^L s_y \right)^2 - n.$$

Therefore,

$$\begin{aligned}
 \widehat{\mathcal{L}}_S(h_\omega) &= \frac{1}{n(n-1)} \sum_{i \neq j}^n \ell(h_\omega(\delta_{ij}), \lambda_{ij}) \\
 &= \frac{1}{n(n-1)} \sum_{i \neq j}^n \frac{1 - \lambda_{ij} h_\omega(\delta_{ij})}{2} \\
 &= \frac{1}{2} - \frac{1}{2n(n-1)} \sum_{i \neq j}^n \lambda_{ij} h_\omega(\mathbf{x}_i - \mathbf{x}_j) \\
 &= \frac{1}{2} - \frac{1}{2n(n-1)} \left[ 2 \sum_{y=1}^L (c_y^2 + s_y^2) - \left( \sum_{y=1}^L c_y \right)^2 - \left( \sum_{y=1}^L s_y \right)^2 - n \right] \\
 &= \frac{n}{2(n-1)} - \frac{1}{2n(n-1)} \left[ 2 \sum_{y=1}^L (c_y^2 + s_y^2) - \left( \sum_{y=1}^L c_y \right)^2 - \left( \sum_{y=1}^L s_y \right)^2 \right].
 \end{aligned}$$

□

### A.3 Experiments

**Implementation details.** The code used to run the experiments is available at:

<https://github.com/gletarte/pbrff>

In Section 6 we use the following datasets:

**ads** <http://archive.ics.uci.edu/ml/datasets/Internet+Advertisements>

The first 4 features which have missing values are removed.

**adult** <https://archive.ics.uci.edu/ml/datasets/Adult>

**breast** [https://archive.ics.uci.edu/ml/datasets/Breast+Cancer+Wisconsin+\(Diagnostic\)](https://archive.ics.uci.edu/ml/datasets/Breast+Cancer+Wisconsin+(Diagnostic)).

**farm** <https://archive.ics.uci.edu/ml/datasets/Farm+Ads>

**mnist** <http://yann.lecun.com/exdb/mnist/>

As Sinha and Duchi (2016), binary classification tasks are compiled with the following digits pairs: 1 vs. 7, 4 vs. 9, and 5 vs. 6.

We split the datasets into training and testing sets with a 75/25 ratio except for adult which has a training/test split already computed. We then use 20% of the training set for validation. Table 2 presents an overview. We use the following parameter values range for selection on the validation set:

- $C \in \{10^{-5}, 10^{-4}, \dots, 10^4\}$
- $\sigma \in \{10^{-7}, 10^{-6}, \dots, 10^2\}$
- $\rho \in \{10^{-4}N, 10^{-3}N, \dots, 10^0N\}$
- $\beta \in \{10^{-3}, 10^{-2}, \dots, 10^3\}$
- $D \in \{8, 16, 32, 64, 128\}$

| Dataset | $n_{train}$ | $n_{valid}$ | $n_{test}$ | $d$   |
|---------|-------------|-------------|------------|-------|
| ads     | 1967        | 492         | 820        | 1554  |
| adult   | 26048       | 6513        | 16281      | 108   |
| breast  | 340         | 86          | 143        | 30    |
| farm    | 2485        | 622         | 1036       | 54877 |
| mnist17 | 9101        | 2276        | 3793       | 784   |
| mnist49 | 8268        | 2068        | 3446       | 784   |
| mnist56 | 7912        | 1979        | 3298       | 784   |

Table 2: Datasets overview.

**Supplementary experiments.** Figures 4 and 6 present extra results obtained for the *landmarks-based learning* experiments (Subsection 6.1). Figure 5 gives extra results for the *greedy kernel learning* experiment (Subsection 6.2).

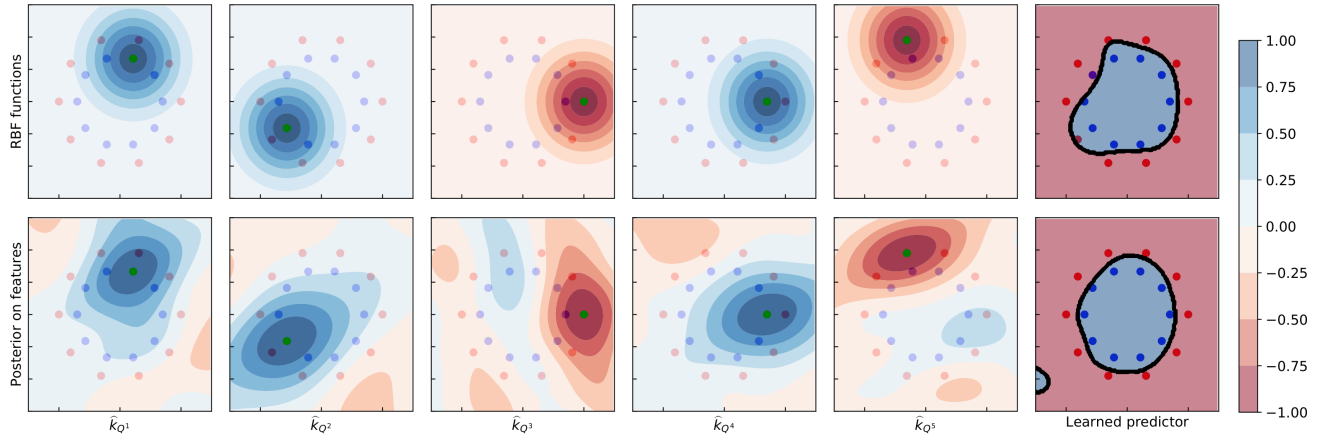

Figure 4: Repetition of Figure 1’s experiment, with another toy dataset. First row shows selected RBF-Landmarks kernel outputs, while second row shows the corresponding learned similarity measures on random Fourier features (PB-Landmarks). The rightmost column displays the classification learned by a linear SVM over the mapped dataset.

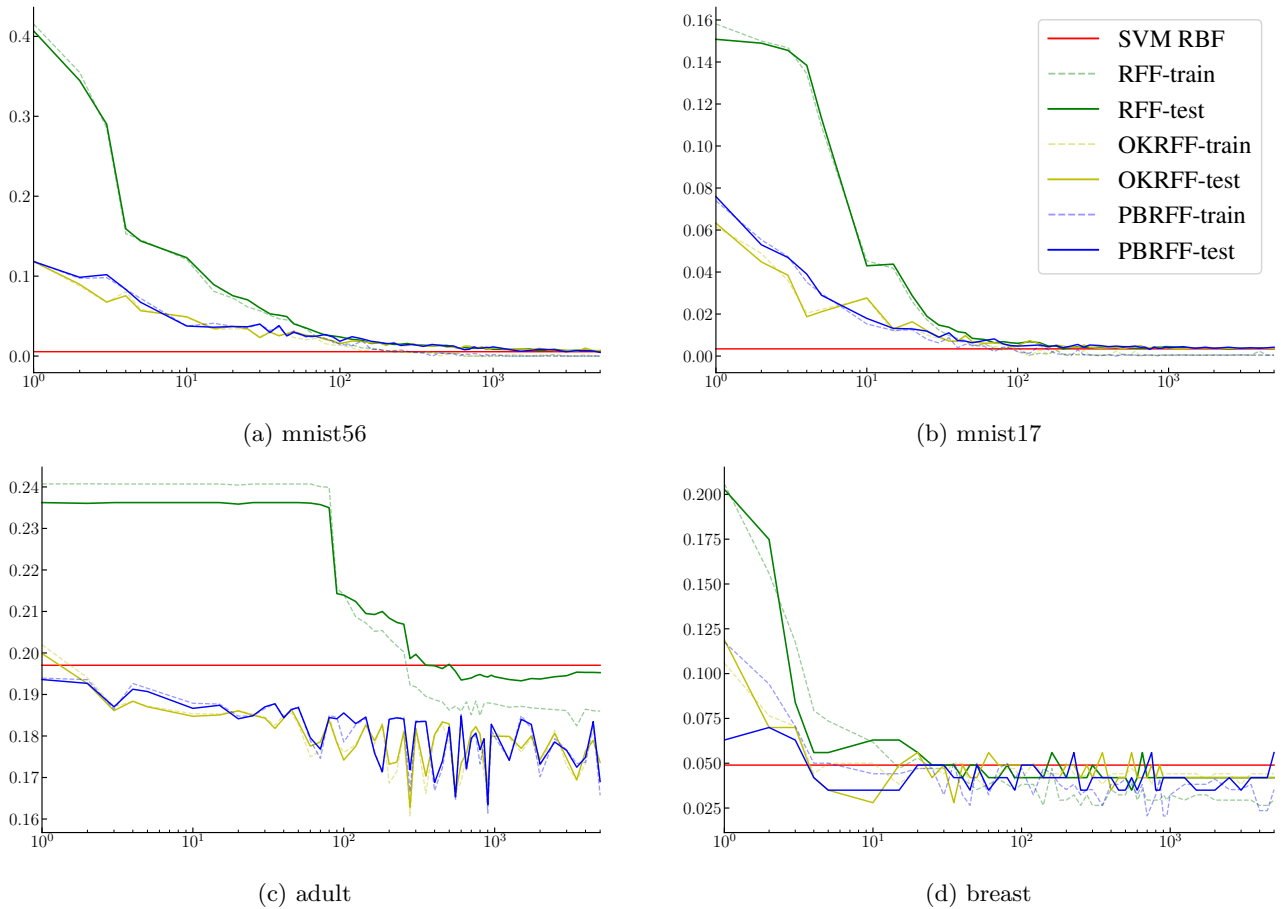

Figure 5: Train and test error of the kernel learning approaches according to the number of random features  $D$  on the remaining 4 datasets (not reported by Figure 3).

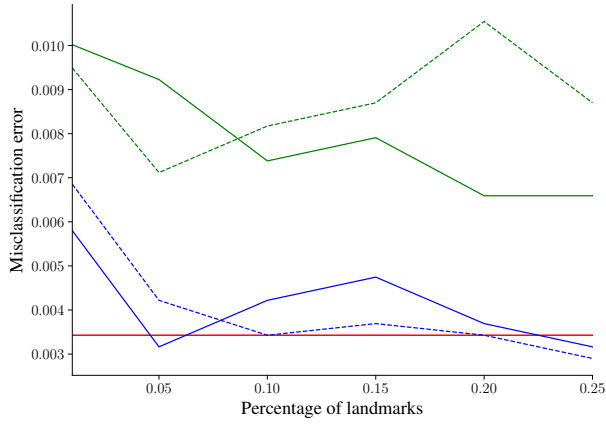

(a) mnist17

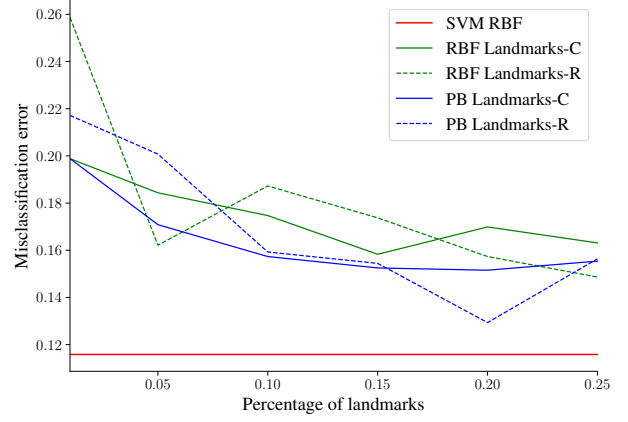

(b) farm

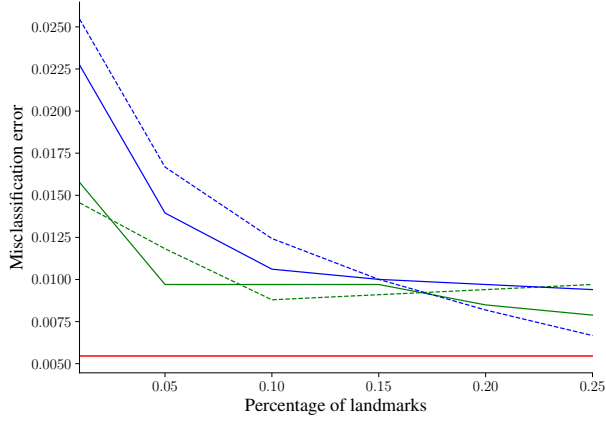

(c) mnist56

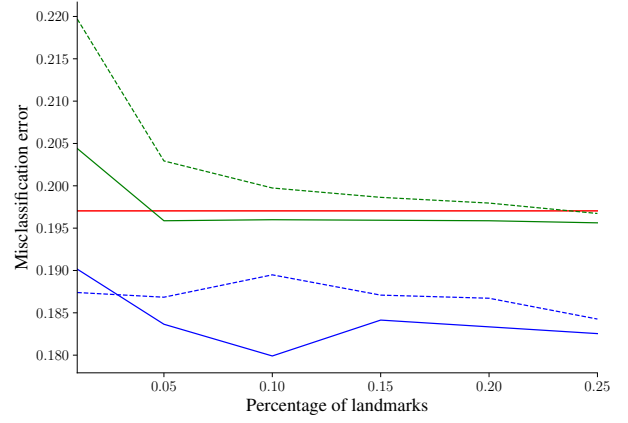

(d) adult

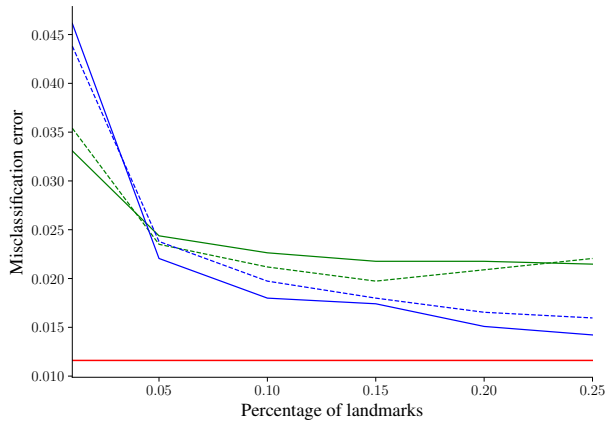

(e) mnist49

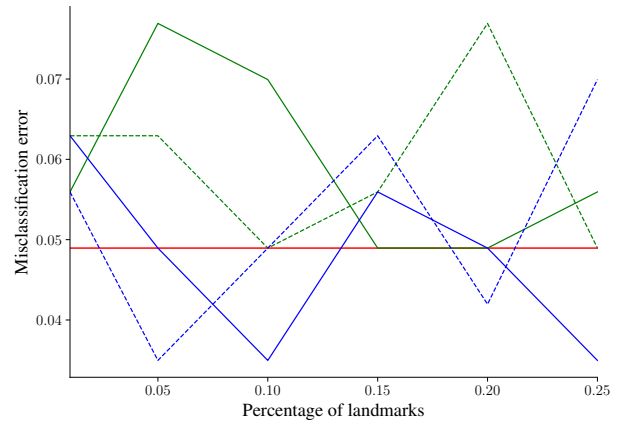

(f) breast

Figure 6: Behavior of the landmarks-based approach according to the percentage of training points selected as landmarks on the remaining 6 datasets (not reported by Figure 2).
